# Supplementary material for: Simultaneous and independent detection of C9ORF72 alleles with low and high number of GGGGCC repeats using an optimised protocol of Southern blot hybridisation
Source: PubMed Central journal article supplement (PMC3626718; doi:10.1186/1750-1326-8-12), 2013-04-08
Supplement: 1750-1326-8-12-S1.pdf [file 1750-1326-8-12-S1.pdf]

Supplementary Table 1. Ratios of 1.33 kb and 1.05 kb bands intensities for samples shown in Figure 1C

|                  | 1   | 2   | 3   | 4   | 5   | 6   | 7   | 8   | 9   | 10  | 11  | 12  | 13  | 14  | 15  | 16  | 17  | 18  | 19  | 20  | 21  | 22  | 23  | 24  | 25  | 26  |
|------------------|-----|-----|-----|-----|-----|-----|-----|-----|-----|-----|-----|-----|-----|-----|-----|-----|-----|-----|-----|-----|-----|-----|-----|-----|-----|-----|
| GGGGCC repeats   | +   | -   | +   | +   | +   | +   | +   | +   | +   | +   | +   | +   | +   | +   | +   | +   | +   | +   | +   | +   | +   | +   | -   | +   | +   | +   |
| 1.33 :1.05 ratio | 1.1 | 2.1 | 1.1 | 1.0 | 1.0 | 1.1 | 1.0 | 1.0 | 0.9 | 1.0 | 1.0 | 1.0 | 1.1 | 1.0 | 1.0 | 1.0 | 1.1 | 1.1 | 1.0 | 1.0 | 1.1 | 1.2 | 2.2 | 1.1 | 1.1 | 1.1 |
